# Supplementary material for: Biopolymer-mediated synthesis of anisotropic piezoelectric nanorods
Source: Royal Society of Chemistry journal article supplement (doi:10.1039/c0cc00516a), 2010-01-01
Supplement: c0cc00516a.pdf [file c0cc00516a.pdf]

# Unprecedented Synthesis of Piezoelectric Languasite Nanorods

Zoe Schnepf, John Mitchells, Stephen Mann and Simon R. Hall

## Supplementary Information

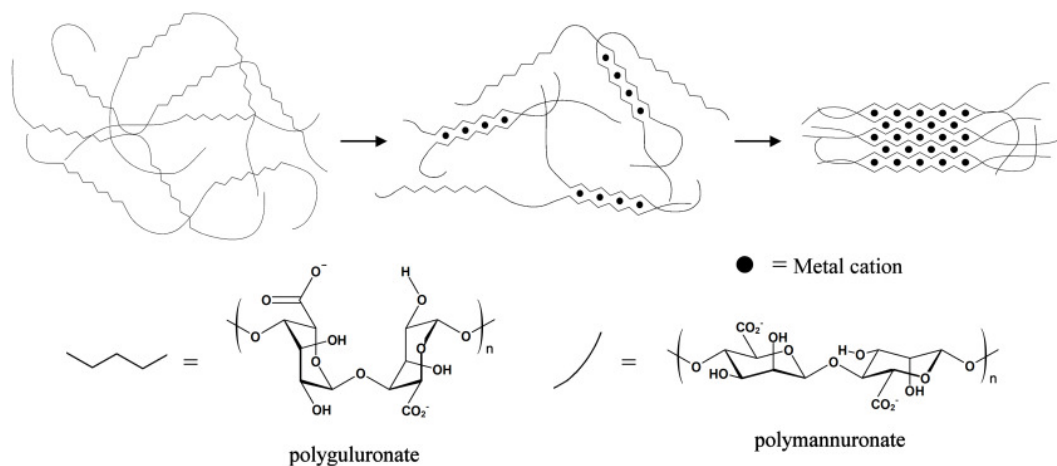

**Figure S1** The egg-box model of cation binding in the alginate biopolymer.

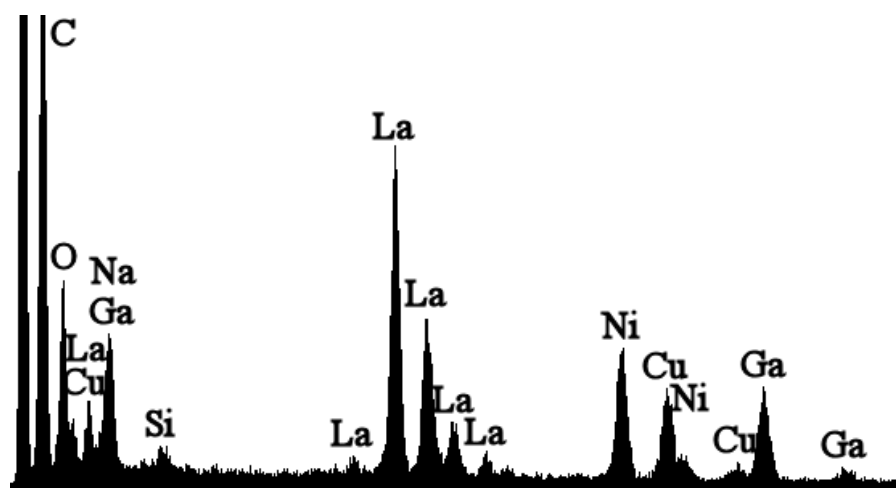

**Figure S2** EDXA for a single nanorod of languasite, showing peaks for lanthanum, gallium and silicon.

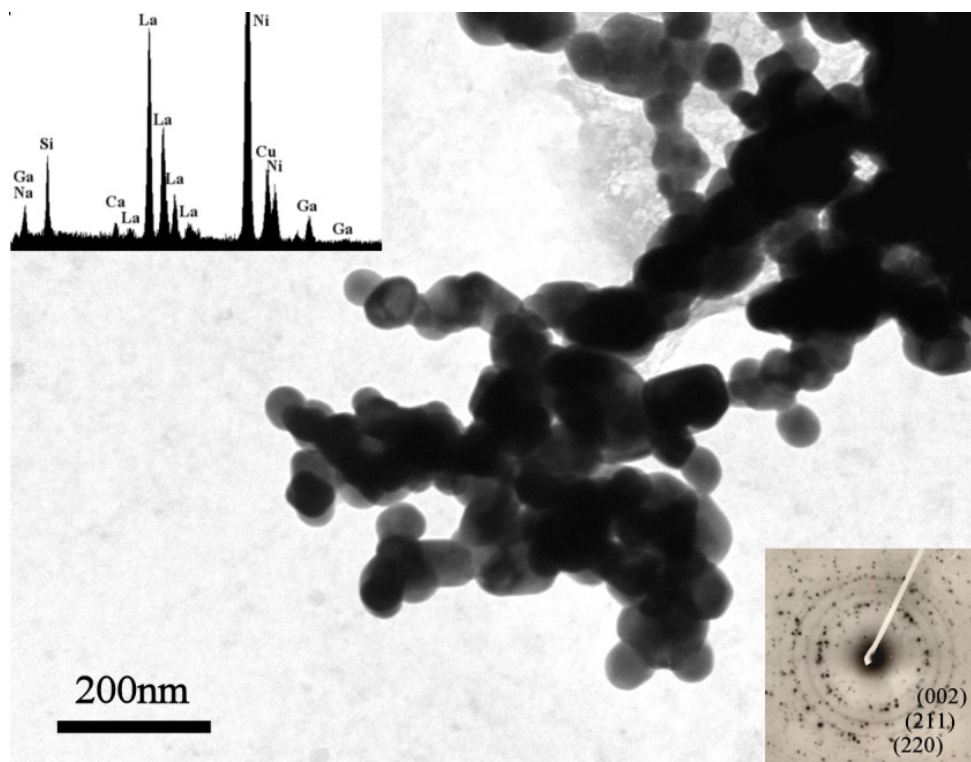

**Figure S3** TEM image with corresponding EDXA and SAED ring pattern showing the nature of the  $\text{La}_{9.33}\text{Si}_6\text{O}_{26}$  phase.

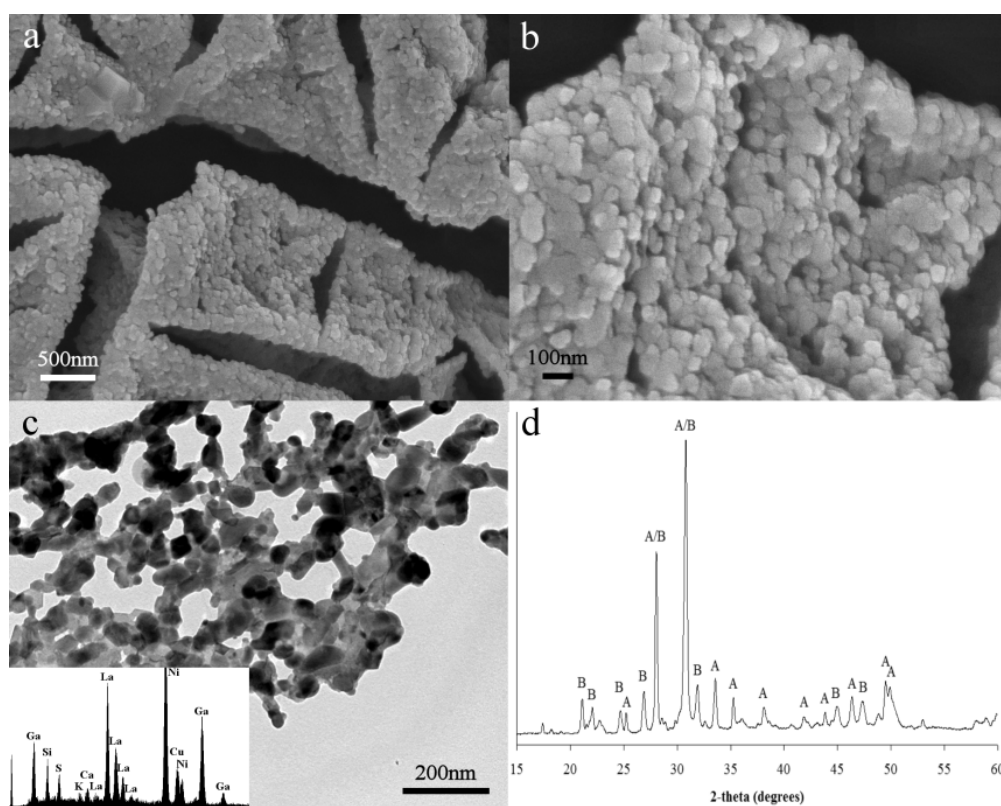

**Figure S4** SEM (a,b), TEM with corresponding EDXA (c) and PXRD pattern (d) for a sample synthesized from agar. The PXRD pattern shows peaks for  $\text{La}_3\text{Ga}_5\text{SiO}_{14}$  (A) and  $\text{La}_{9.33}\text{Si}_6\text{O}_{26}$  (B).

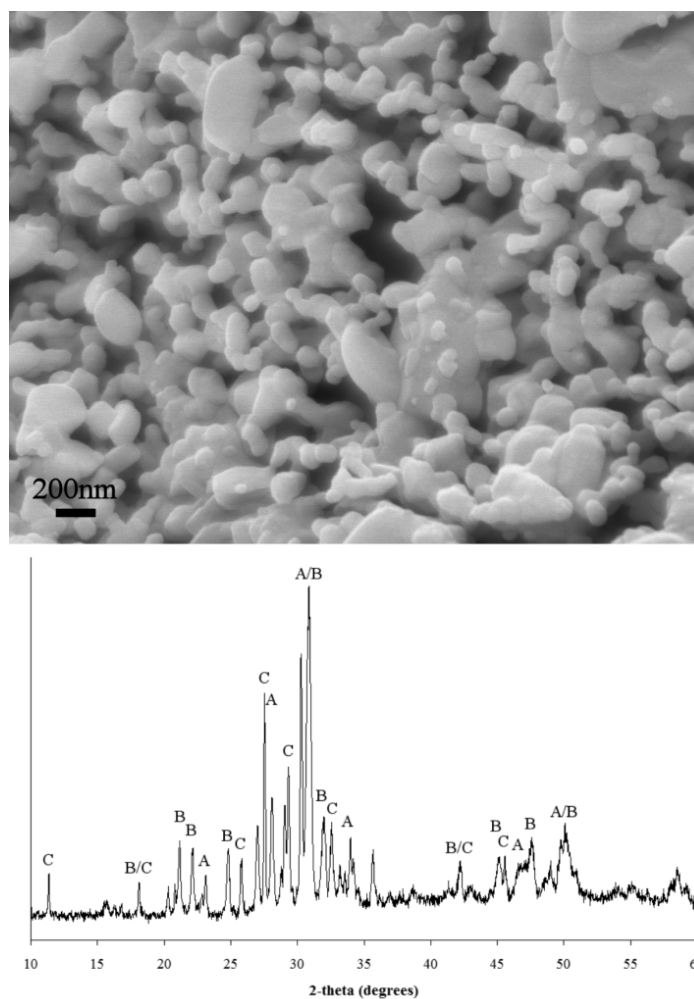

**Figure S5** SEM image and PXRD pattern for a sample synthesized from ammonium alginate, showing peaks for  $\text{La}_3\text{Ga}_5\text{SiO}_{14}$  (A),  $\text{La}_{9.33}\text{Si}_6\text{O}_{26}$  (B) and  $\text{La}_4\text{Ga}_2\text{O}_9$  (C).

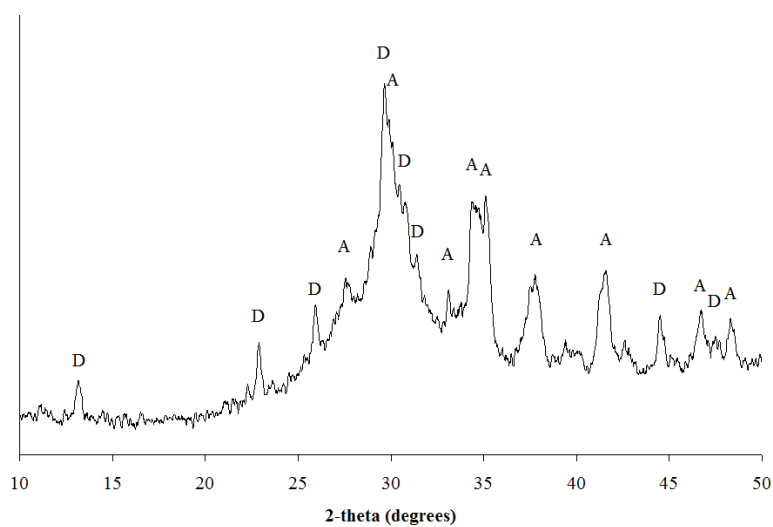

**Figure S6** An XRD pattern of a sample quenched at 500 °C during calcination from sodium alginate, showing peaks for (A)  $\text{Na}_2\text{CO}_3$  and (D)  $\text{La}_2\text{O}_2\text{CO}_3$ . Similar peaks for  $\text{Na}_2\text{CO}_3$  were observed for samples at 600 °C, 700 °C and 800 °C.

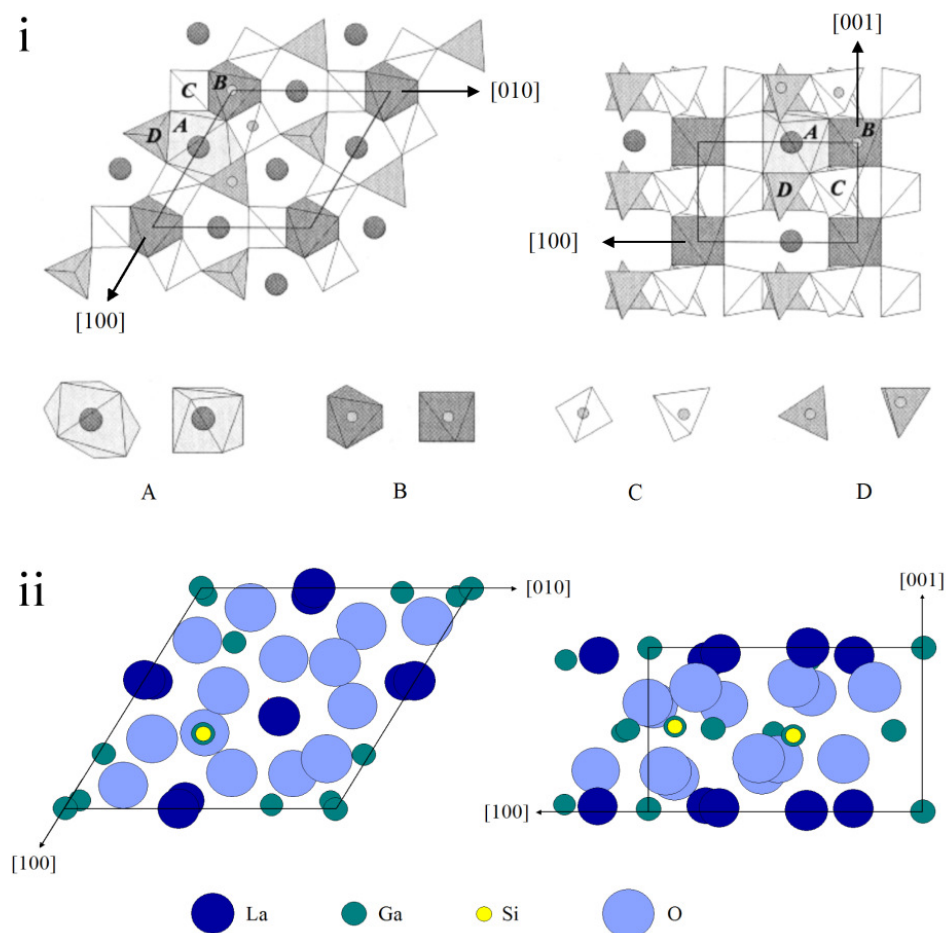

**Figure S7** The crystal structure (i) of the langasite mineral family based on the formula  $A_3BC_3D_2O_{14}$ , showing the decahedral A sites, octahedral B sites and tetrahedral C and D sites (figure adapted from Iwataki *et al.*, *J. Eur. Ceram. Soc.* (2001) 21, 1409-1412) showing a view of the unit cell down the  $c$ -axis (left) and also a view down the  $[120]$  direction (right).  $GaO_4$  and  $SiO_4$  tetrahedra form layers perpendicular to the  $c$ -axis that are connected by octahedral  $GaO_6$  and decahedral  $LaO_8$  ions. Also shown is the arrangement of atoms in the unit cell of langasite (ii) showing a view of the unit cell down the  $c$ -axis (left) and down the  $[120]$  direction (right).

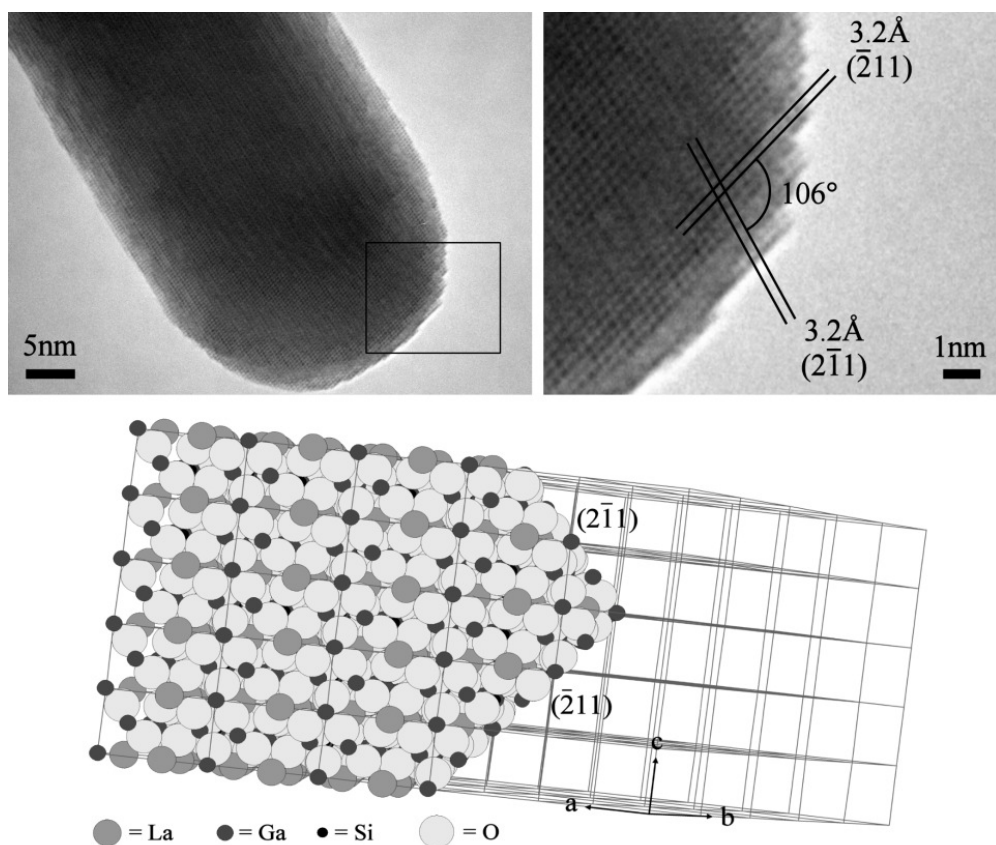

**Figure S8** An example of a needle with two sets of planes, assigned  $(\bar{2}11)$  and  $(\bar{2}\bar{1}1)$ , at  $106^\circ(74^\circ)$ , which corresponds to a zone axis of  $\langle 120 \rangle$ . A model of the langasite crystal in this zone axis is also shown with the structure cut away along the  $(\bar{2}11)$  and  $(\bar{2}\bar{1}1)$  planes, corresponding to the 'stepped' surface observed in the crystal.

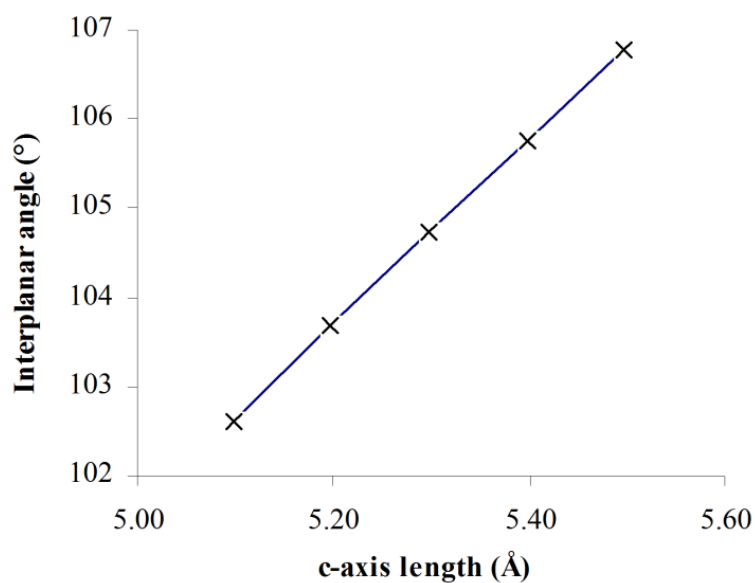

**Figure S9** The variation of the interplanar angle with increasing  $c$ -axis length for the set of planes detailed in figure S8.
